# Supplementary material for: Effect of Ni atomic fraction on active species of graphene growth on Cu–Ni alloy catalysts: a density functional theory study
Source: Royal Society of Chemistry journal article supplement (doi:10.1039/d2cp04621k), 2022-12-07
Supplement: d2cp04621k1.pdf [file d2cp04621k1.pdf]

## Supplemental Materials

### Effect of Ni atomic fraction on active species of graphene growth on Cu-Ni alloy catalysts: a density functional theory study

Erik Bhekti Yutomo, Fatimah Arofiati Noor\*, Toto Winata

Physics of Electronic Materials Research Division, Department of Physics, Faculty of  
Mathematics and Natural Sciences, Institut Teknologi Bandung, Jalan Ganesa no. 10 Bandung  
40132, Indonesia.

\*Corresponding author: [fatimah@itb.ac.id](mailto:fatimah@itb.ac.id)

#### S1. Structural parameters of the carbon source species

Table S1 compares the optimized C-H bond lengths,  $d_{C-H}$ , of the radical species  $CH_n$  ( $n=1,2,3$ ) with the previous experimental and computational studies.

Table S1. Comparison of the optimized C-H bond lengths,  $d_{C-H}$ , of the radical species  $CH_n$  ( $n=1,2,3$ )

| Radical species | $d_{C-H}$  |                                 |                                  |
|-----------------|------------|---------------------------------|----------------------------------|
|                 | This study | Previous experimental study [1] | Previous computational study [2] |
| CH <sub>3</sub> | 1.087      | -                               | -                                |
| CH <sub>2</sub> | 1.086      | 1.085                           | 1.084                            |
| CH              | 1.137      | 1.120                           | 1.132                            |

## S2. The effect of Ni atoms on the Cu-Ni alloy catalyst.

Two possible structures for the Cu-Ni-1 and Cu-Ni-2 catalysts are shown in Fig. S1. The calculated doping formation energy is also included.

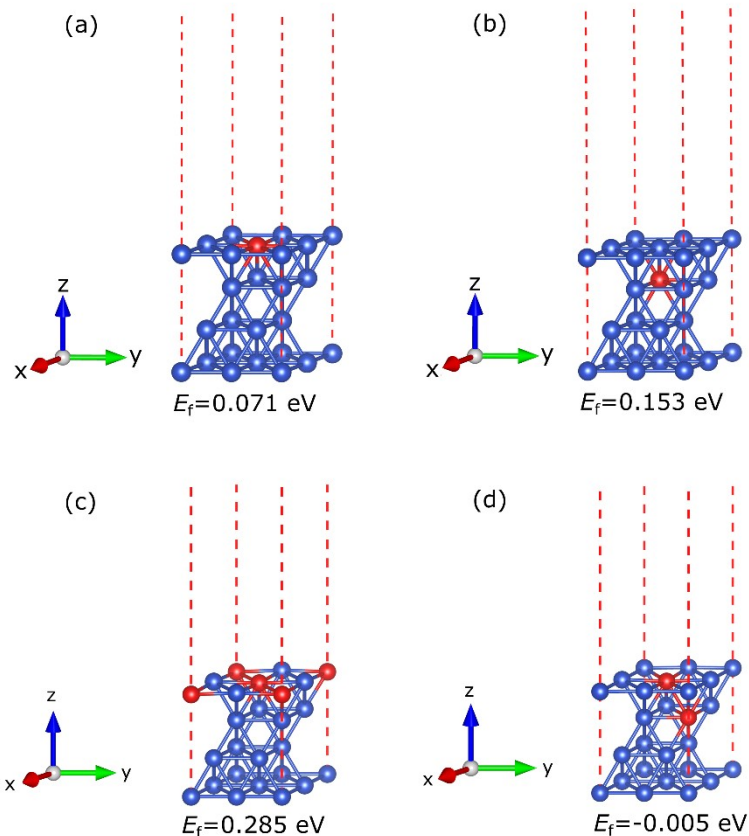

Fig. S1. Comparison of the doped formation energy of the possible configurations of the (a,b) Cu-Ni-1, and (c,d) Cu-Ni-2 catalysts.

The total density of states (TDOS) and the projected density of states (PDOS) of the d-orbitals of Cu-Ni-2 and Cu-Ni-3 catalysts are shown in Figs. S2(a) and (b), respectively. The PDOS of sub-Ni 3d of Cu-Ni-2 and Cu-Ni-3 catalysts system are presented. Furthermore, the charge density differences of the Cu-Ni-2 and Cu-Ni-3 catalysts are shown in Figs. S2(c) and (d), respectively.

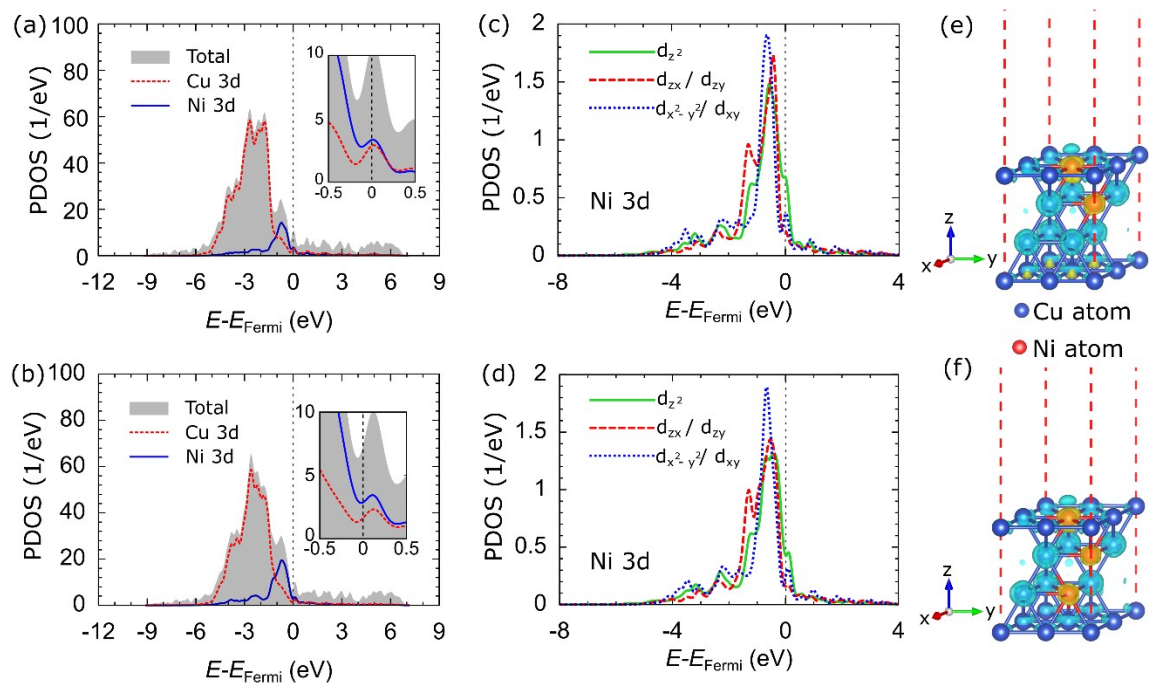

Fig. S2. Total density of states (TDOS) and projected density of states (PDOS) of the d-orbitals of (a) Cu-Ni-2 and (b) Cu-Ni-3 catalysts. The PDOS of sub-Ni 3d of (c) Cu-Ni-2 and (d) Cu-Ni-3 catalysts system are presented. The black dashed line indicates the Fermi level. The charge density difference in (e) Cu-Ni-2 and (f) Cu-Ni-3 catalysts is illustrated by the iso-surface of 0.01 e/Å<sup>3</sup>. Yellow and blue clouds indicate electron accumulation and depletion, respectively.

### S3 Adsorption of carbon source species on the catalyst surface

A comparison of the calculated adsorption energies and equilibrium distances of the carbon source species on the Cu catalyst is shown in Table S2.

Table S2. Adsorption energies,  $E_{ads}$ , and equilibrium distances,  $Z_A$ , of the carbon source species and H<sub>2</sub>O on the Cu catalyst surface

| carbon source species | Sites | This calculation |           | Previous study                                |                                            |
|-----------------------|-------|------------------|-----------|-----------------------------------------------|--------------------------------------------|
|                       |       | $E_{ads}$ (eV)   | $Z_A$ (Å) | $E_{ads}$ (eV)                                | $Z_A$ (Å)                                  |
| CH <sub>4</sub>       | hcp   | -0.190           | 2.715     |                                               |                                            |
|                       | fcc   | -0.190           | 2.729     |                                               |                                            |
|                       | top   | -0.163           | 2.416     | -0.169 <sup>(a)</sup> , -0.160 <sup>(c)</sup> |                                            |
|                       | bri   | -0.177           | 2.656     |                                               |                                            |
| CH <sub>3</sub>       | hcp   | -2.667           | 2.203     | -2.710 <sup>(a)</sup> , -1.850 <sup>(c)</sup> | 2.206 <sup>(c)</sup>                       |
|                       | fcc   | -2.653           | 2.195     | -2.528 <sup>(a)</sup> , -1.850 <sup>(c)</sup> | 2.204 <sup>(c)</sup>                       |
|                       | top   | -2.504           | 1.994     | -2.571 <sup>(a)</sup>                         | 1.990 <sup>(c)</sup>                       |
|                       | bri   | -2.572           | 2.120     |                                               |                                            |
| CH <sub>2</sub>       | hcp   | -4.095           | 1.989     | -4.071 <sup>(a)</sup> , -3.550 <sup>(c)</sup> | 1.971 <sup>(c)</sup>                       |
|                       | fcc   | -4.136           | 1.987     | -4.110 <sup>(a)</sup> , -3.570 <sup>(c)</sup> | 1.971 <sup>(c)</sup>                       |
|                       | top   | -3.252           | 1.835     | -3.294 <sup>(a)</sup>                         |                                            |
|                       | bri   |                  |           |                                               |                                            |
| CH                    | hcp   | -5.633           | 1.904     | -5.592 <sup>(a)</sup> , -5.340 <sup>(c)</sup> | 1.910 <sup>(c)</sup>                       |
|                       | fcc   | -5.701           | 1.904     | -5.662 <sup>(a)</sup> , -5.400 <sup>(c)</sup> | 1.908 <sup>(c)</sup>                       |
|                       | top   | -3.878           | 1.733     |                                               |                                            |
|                       | bri   |                  |           |                                               |                                            |
| C <sub>surf</sub>     | hcp   | -6.204           | 1.832     | -6.178 <sup>(b)</sup>                         | 1.845 <sup>(b)</sup>                       |
|                       | fcc   | -6.245           | 1.838     | -6.238 <sup>(b)</sup>                         | 1.847 <sup>(b)</sup> , 1.98 <sup>(d)</sup> |
|                       | top   | -4.272           | 1.748     | -4.281 <sup>(b)</sup>                         | 1.750 <sup>(b)</sup>                       |
|                       | bri   | -6.109           | 1.806     | -6.178 <sup>(b)</sup>                         | 1.808 <sup>(b)</sup>                       |
| H <sub>2</sub> O      | top   | -0.408           | 2.346     | -0.390 <sup>(d)</sup>                         |                                            |

<sup>(a)</sup> is the calculation results of ref. [3], in which the catalyst is modeled with a four-layer (4×4) periodic slab, <sup>(b)</sup> is the calculation results of ref. [4], in which the catalyst is modeled with a five-layer (3×3) periodic slab, <sup>(c)</sup> is the calculation results of ref. [5], in which the catalyst is modeled with a three-layer (3×3) periodic slab, and <sup>(d)</sup> is the experimental result of ref. [6], <sup>(d)</sup> is the calculation results of ref. [7], in which the catalyst is modeled with a five-layer (3×3) periodic slab

The calculated adsorption energies of the carbon source species on the Cu-Ni catalyst surface with various Ni atomic fractions are shown in Table S3.

Table S3. Adsorption energies  $E_{ads}$  of the carbon source species and H<sub>2</sub>O on the Cu-Ni catalyst surface with various Ni atomic fractions

| Cu-Ni-1               |                        |                        |                          |                          |                          |                          |                     |                     |                     |                     |
|-----------------------|------------------------|------------------------|--------------------------|--------------------------|--------------------------|--------------------------|---------------------|---------------------|---------------------|---------------------|
| carbon source species | $E_{ads}$ (eV)         |                        |                          |                          |                          |                          |                     |                     |                     |                     |
|                       | hcp <sub>3</sub> Cu-Cu | fcc <sub>3</sub> Cu-Cu | hcp <sub>2</sub> CuNi-Cu | fcc <sub>2</sub> CuNi-Cu | top <sub>Cu</sub>        | top <sub>Ni</sub>        | bri <sub>CuCu</sub> | bri <sub>CuNi</sub> |                     |                     |
| CH <sub>3</sub>       |                        | -1,837                 |                          | -2,572                   | -2.068                   | -2.685                   | -2.000              | -2.422              |                     |                     |
| CH <sub>2</sub>       | -3.959                 | -3.823                 | -4.490                   | -4.572                   |                          | -4.055                   |                     |                     |                     |                     |
| CH                    | -5.578                 | -5.565                 | -6.232                   | -6.313                   |                          | -5.034                   |                     |                     |                     |                     |
| C <sub>surf</sub>     | -6.150                 | -6.354                 | -7.075                   | -7.098                   |                          | -5.742                   |                     |                     |                     |                     |
| H <sub>2</sub> O      |                        |                        |                          |                          | -0.503                   |                          |                     |                     |                     |                     |
| Cu-Ni-2               |                        |                        |                          |                          |                          |                          |                     |                     |                     |                     |
| carbon source species | $E_{ads}$ (eV)         |                        |                          |                          |                          |                          |                     |                     |                     |                     |
|                       | hcp <sub>3</sub> Cu-Cu | fcc <sub>3</sub> Cu-Cu | hcp <sub>2</sub> CuNi-Cu | fcc <sub>2</sub> CuNi-Cu | hcp <sub>2</sub> CuNi-Ni | top <sub>Cu</sub>        | top <sub>Ni</sub>   | bri <sub>CuCu</sub> | bri <sub>CuNi</sub> |                     |
| CH <sub>3</sub>       |                        | -1.946                 |                          | -2.694                   |                          | -2.177                   | -2.626              | -2.109              | -2.531              |                     |
| CH <sub>2</sub>       | -4.028                 | -3.892                 | -4.585                   | -4.640                   | -4.449                   |                          | -4.123              |                     |                     |                     |
| CH                    | -5.578                 | -5.579                 | -6.259                   | -6.327                   | -6.150                   |                          |                     |                     |                     |                     |
| C <sub>surf</sub>     | -6.161                 | -6.365                 | -7.113                   | -7.107                   | -6.993                   |                          |                     |                     |                     |                     |
| H <sub>2</sub> O      |                        |                        |                          |                          | -0.503                   |                          |                     |                     |                     |                     |
| Cu-Ni-3               |                        |                        |                          |                          |                          |                          |                     |                     |                     |                     |
| carbon source species | $E_{ads}$ (eV)         |                        |                          |                          |                          |                          |                     |                     |                     |                     |
|                       | hcp <sub>3</sub> Cu-Cu | fcc <sub>3</sub> Cu-Cu | hcp <sub>2</sub> CuNi-Cu | fcc <sub>2</sub> CuNi-Cu | hcp <sub>2</sub> CuNi-Ni | fcc <sub>2</sub> CuNi-Ni | top <sub>Cu</sub>   | top <sub>Ni</sub>   | bri <sub>CuCu</sub> | bri <sub>CuNi</sub> |
| CH <sub>3</sub>       |                        | -2.680                 |                          | -2.708                   |                          | -2.612                   | -2.191              | -2.667              | -2.123              | -2.544              |
| CH <sub>2</sub>       | -4.068                 | -4.054                 | -4.585                   | -4.680                   | -4.463                   | -4.612                   |                     | -4.163              |                     |                     |
| CH                    | -5.606                 | -5.592                 | -6.272                   | -6.340                   | -6.177                   | -6.272                   |                     |                     |                     |                     |
| C <sub>surf</sub>     | -6.204                 | -6.190                 | -7.130                   | -7.157                   | -7.034                   | -7.062                   |                     |                     |                     |                     |
| H <sub>2</sub> O      |                        |                        |                          |                          | -0.517                   |                          |                     |                     |                     |                     |

The optimized structures of the adsorbed carbon source species with the lowest adsorption energies on the surfaces of the Cu and Cu-Ni catalysts are shown in Fig. S3.

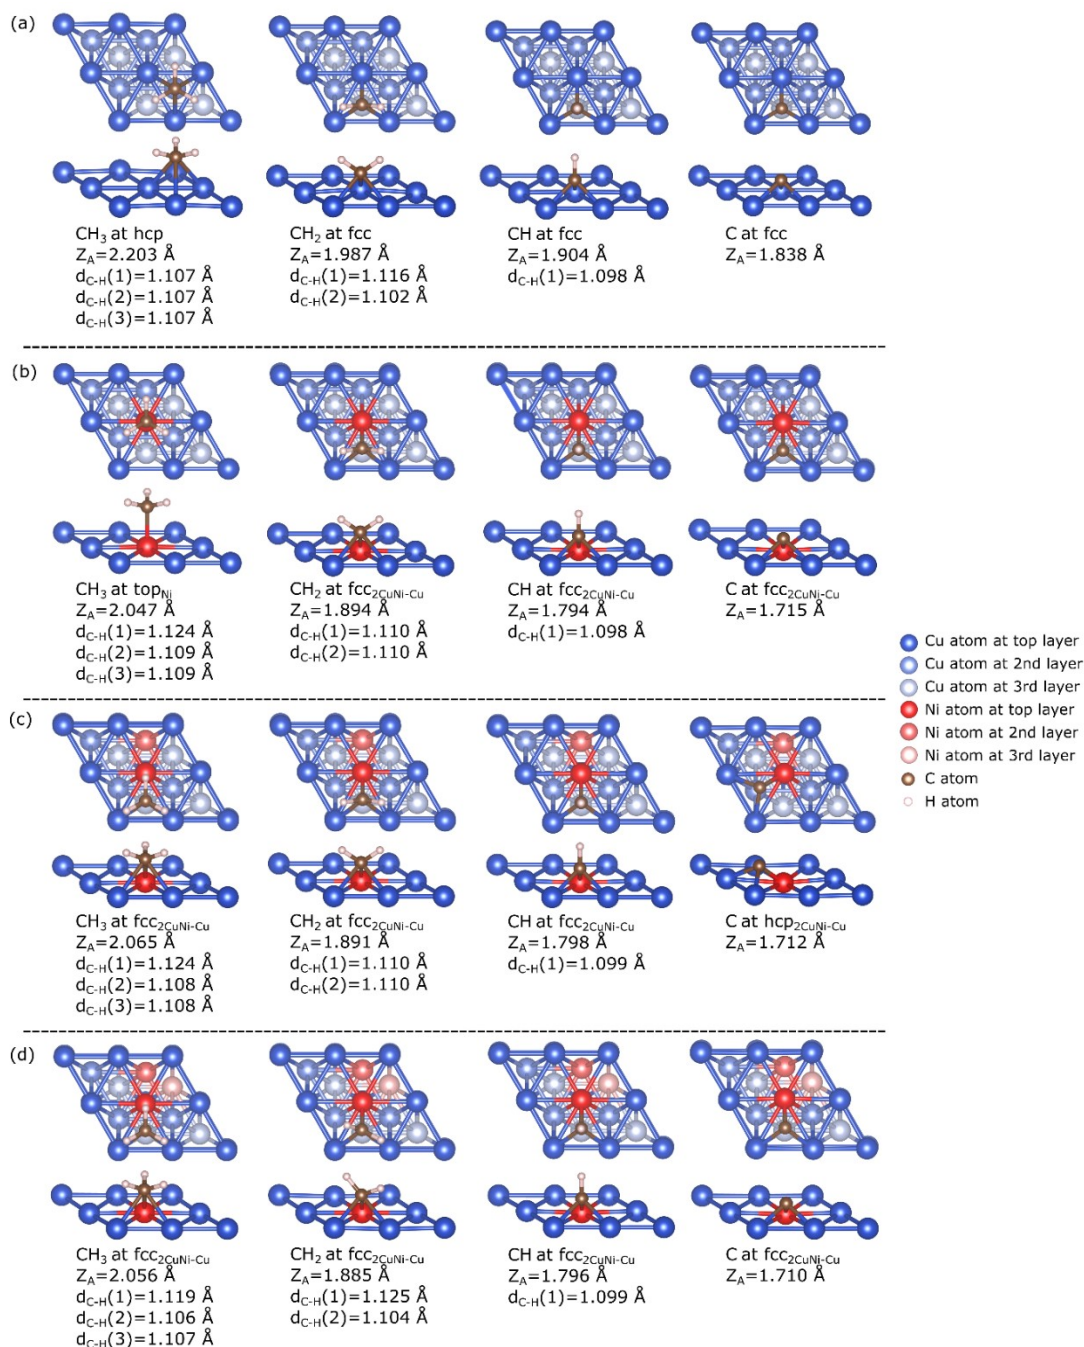

Fig. S3. The optimized structure of the adsorbed carbon source species with the lowest adsorption energy on the surfaces of the (a) Cu, (b) Cu-Ni-1, (c) Cu-Ni-2, and (d) Cu-Ni-3 catalysts surface. The equilibrium distances and optimized C-H bond lengths are also listed.

The charge density differences of carbon source species on the surfaces of the Cu and Cu-Ni catalysts at their respective preferred sites are shown in Fig. S4.

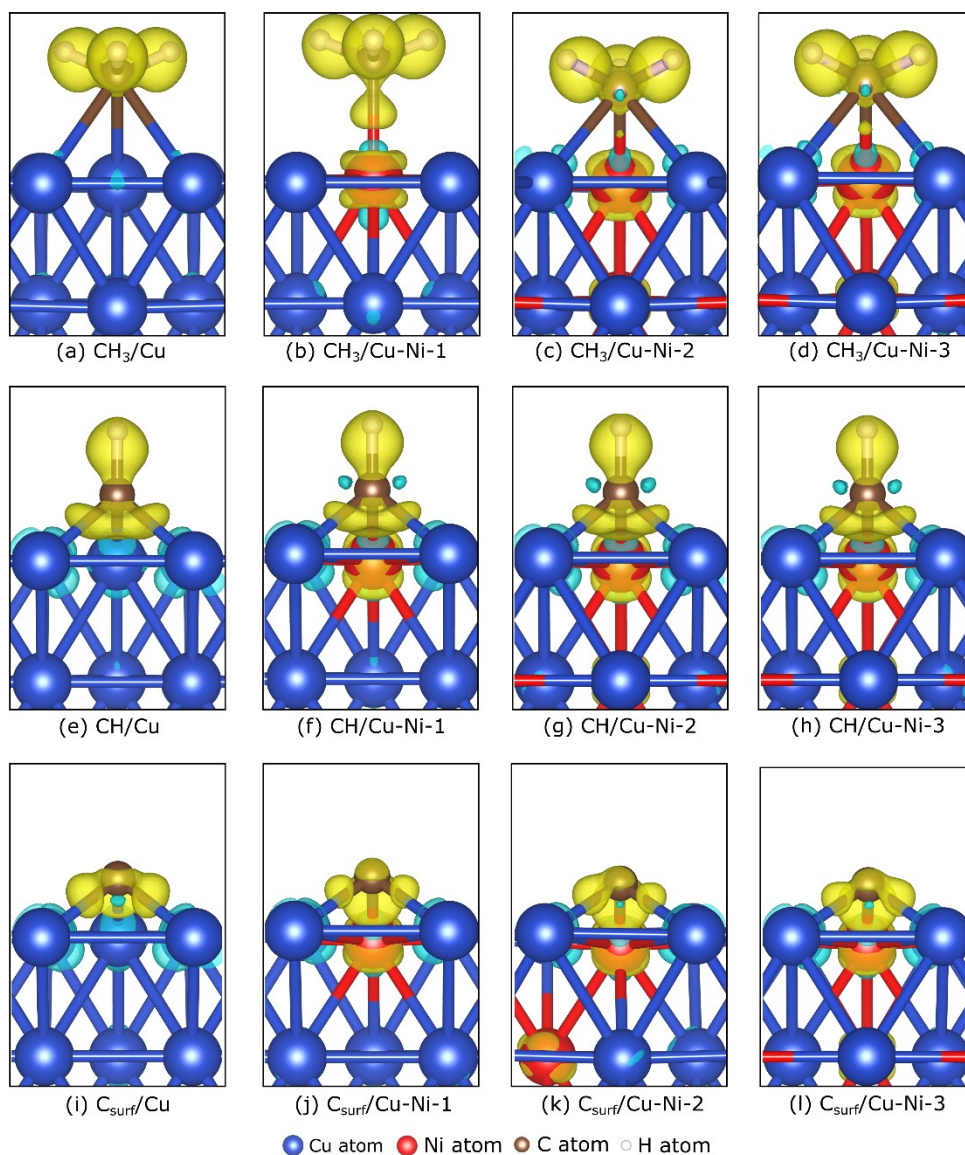

Fig. S4. The charge density differences of (a–d) CH<sub>3</sub>, (e–h) CH, and (i–l) C<sub>surf</sub> on the surfaces of the Cu and Cu-Ni catalysts at their respective preferred sites are illustrated by the 0.015 e/Å<sup>-3</sup> iso-surface. Yellow and blue clouds indicate electron accumulation and depletion, respectively.

Fig. S5 shows the local density of states (LDOS) of isolated carbon source species (CH<sub>3</sub>, CH, and C) and adsorbed carbon source species on Cu and Cu-Ni catalyst surfaces. The carbon atom in the CH<sub>3</sub> species tends to sp<sup>3</sup> hybridize, forming three  $\sigma$  orbitals (Fig. S5(a)), while the carbon

atom in the CH species tends to sp hybridize, forming two  $\sigma$  orbitals and one  $\pi$  orbital (Fig. S5(b)). The C atom has s and p atomic orbitals (Fig. S5(c)). All adsorption systems show that increasing the fraction of Ni atoms in the alloy catalyst causes the Ni atomic orbitals to shift to a higher energy level, indicating an increase in the d-band center. Moreover, the Ni 3d-orbitals become more delocalized as the atomic fraction of Ni is increased

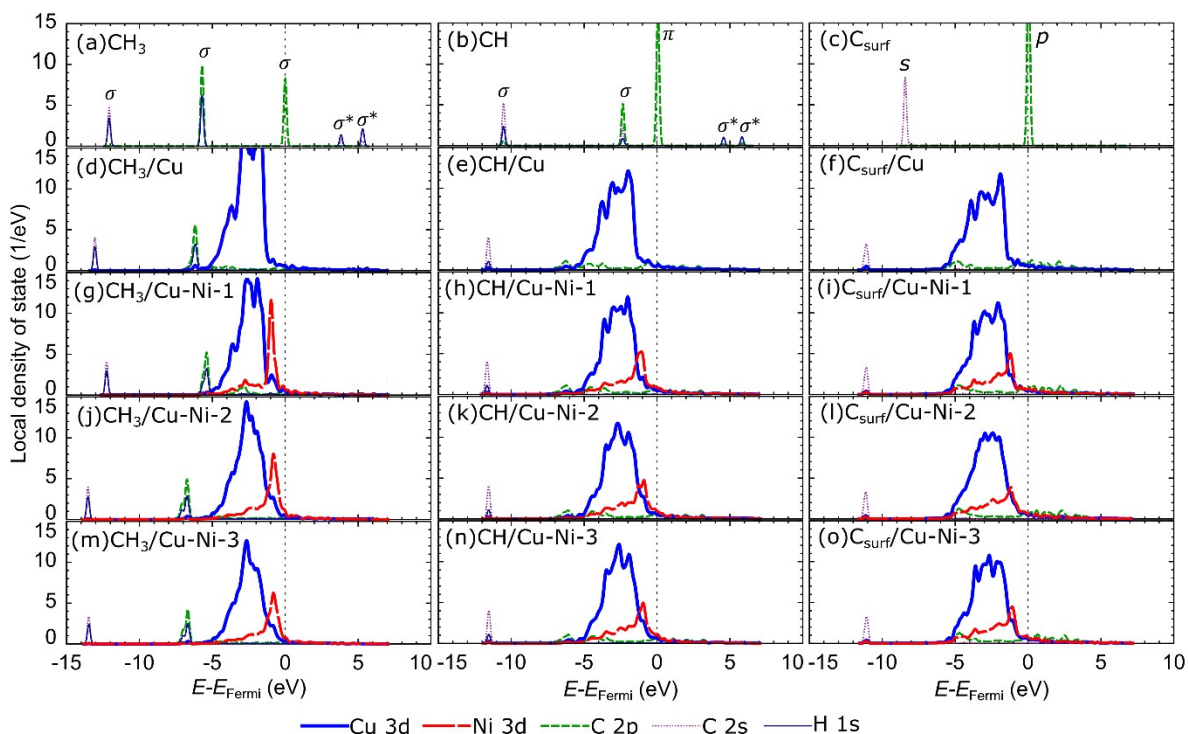

Fig. S5. Local density of states (LDOS) of (a-c) isolated carbon source species, carbon source species on the surface of (d-f) Cu, (g-i) Cu-Ni-1, (j-l) Cu-Ni-2, and (m-o) Cu-Ni-3 catalyst. The d-bands of Cu and Ni are projected to the topmost Cu and Ni atoms, respectively.



#### S4. Adsorption of a carbon monomer on the catalyst subsurface

The calculated adsorption energies of the carbon monomer species at possible octahedral (*octa*) sites of the Cu and Cu-Ni catalyst subsurfaces are shown in Table S4.

Table S4. The adsorption energies of carbon monomer species at possible octahedral (*octa*) sites of the subsurfaces of the Cu and Cu-Ni catalysts. “N/A” indicates the site is not present on the associated catalyst.

| Catalysts | Carbon monomer species | $E_{ads}$ (eV)          |                           |                           |                             |
|-----------|------------------------|-------------------------|---------------------------|---------------------------|-----------------------------|
|           |                        | octa <sub>3Cu-3Cu</sub> | octa <sub>2CuNi-3Cu</sub> | octa <sub>3Cu-2CuNi</sub> | Octa <sub>2CuNi-2CuNi</sub> |
| Cu        | C <sub>sub-1</sub>     | -5.837                  | N/A                       | N/A                       | N/A                         |
|           | C <sub>sub-2</sub>     | -5.660                  | N/A                       | N/A                       | N/A                         |
| Cu-Ni-1   | C <sub>sub-1</sub>     | -6.517                  | -7.062                    | N/A                       | N/A                         |
|           | C <sub>sub-2</sub>     | -6.259                  | N/A                       | N/A                       | N/A                         |
| Cu-Ni-2   | C <sub>sub-1</sub>     | N/A                     | -6.789                    | -6.925                    | -7.334                      |
|           | C <sub>sub-2</sub>     | -6.245                  | -6.762                    | N/A                       | N/A                         |
| Cu-Ni-3   | C <sub>sub-1</sub>     | N/A                     | -6.885                    | -6.953                    | -7.415                      |
|           | C <sub>sub-2</sub>     | N/A                     | -6.721                    | -6.708                    | -7.225                      |

The charge density differences of a carbon monomer on the second subsurfaces of Cu and Cu-Ni catalysts at their respective preferred sites are shown in Fig. S6.

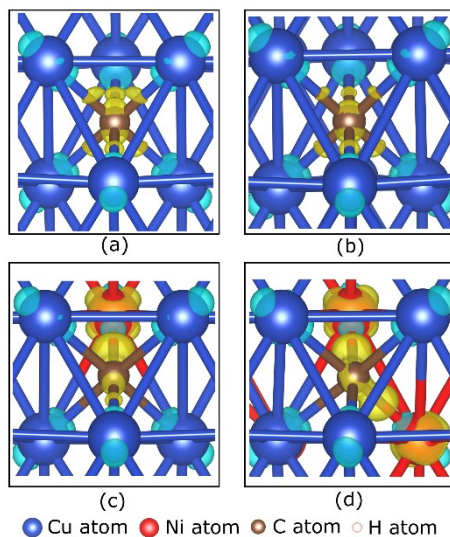

Fig. S6. The charge density differences of a carbon monomer on the second subsurface of (a) Cu, (b) Cu-Ni-1, (c) Cu-Ni-2, and (d) Cu-Ni-3 catalysts at their respective preferred site are illustrated

by the  $0.015 \text{ e}/\text{\AA}$  iso-surface. Yellow and blue clouds indicate electron accumulation and depletion, respectively.

Fig. S7 shows the LDOS of an isolated carbon monomer and an adsorbed carbon monomer on the surfaces of Cu and Cu-Ni catalysts.

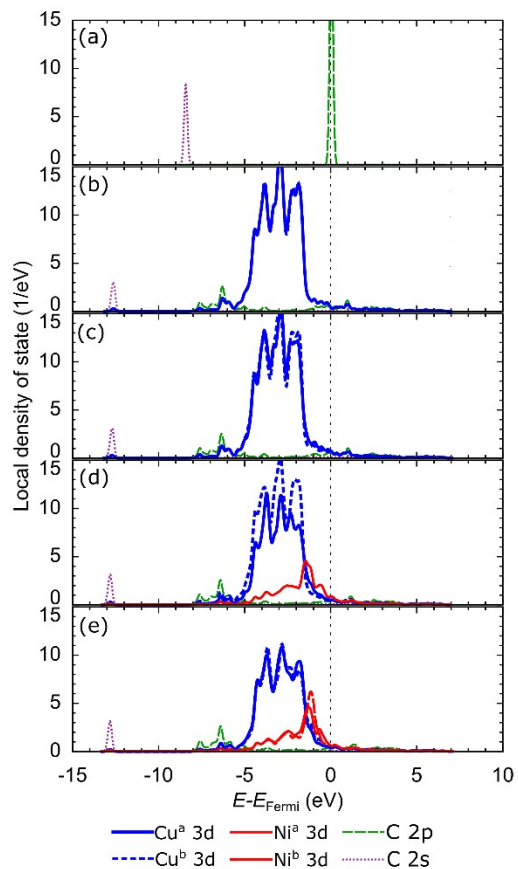

Fig. S7. Local density of states (LDOS) of (a) isolated C, C on the second subsurface of (b) Cu, (c) Cu-Ni-1, (d) Cu-Ni-2, and (e) Cu-Ni-3 catalysts at their preferred sites. The d-bands of Cu and Ni are projected to the Cu and Ni atoms above ( $\text{Cu}^a$  3d and  $\text{Ni}^a$  3d) and below ( $\text{Cu}^b$  3d and  $\text{Ni}^b$  3d) the second subsurface site, respectively.

#### S4. Ab initio thermodynamics analysis

The Gibbs free energy of adsorption ( $\Delta G^{ads}$ ) can be calculated using the following equation [8, 9]:

$$\Delta G^{ads} = E_{total} - E_{cat} + F_{vib} - n_C \mu_C - n_H \mu_H \quad (S1)$$

where  $E_{total}$  is the total energy of the adsorbed carbon source species on the catalyst,  $E_{cat}$  is the total energy of the catalyst,  $F_{vib}$  is a parameter containing the vibrational contribution of the Gibbs free energy,  $n_C$  and  $n_H$  are the number of C and H atoms in the carbon source species ( $\text{CH}_3$ ,  $\text{CH}_2$ ,  $\text{CH}$ ,  $\text{C}_{surf}$ ,  $\text{C}_{sub-1}$ , and  $\text{C}_{sub-2}$ ), respectively, and  $\mu_C$  and  $\mu_H$  are the chemical potentials of carbon and hydrogen atoms, respectively. The vibrational free energy ( $F_{vib}$ ) is formulated according to the following equation [8, 10]:

$$F_{vib} = E^{ZPE} + E^{vib} + TS^{vib} \quad (S2)$$

where  $E^{ZPE}$  is the zero point energy,  $E^{vib}$  is the vibrational energy,  $S^{vib}$  is the vibrational entropy, and  $T$  is the system temperature. These three parameters can be calculated from [8, 10]:

$$E^{ZPE} = \sum_i \frac{\hbar \omega_i}{2} \quad (S3)$$

$$E^{vib} = \sum_i \frac{\hbar \omega_i}{\exp\left(\frac{\hbar \omega_i}{k_B T}\right) - 1} \quad (S4)$$

$$S^{vib} = k_B \left[ \sum_i \frac{\hbar \omega_i}{k_B T \left\{ \exp\left(\frac{\hbar \omega_i}{k_B T}\right) - 1 \right\}} - \ln \left\{ 1 - \exp\left(-\frac{\hbar \omega_i}{k_B T}\right) \right\} \right] \quad (S5)$$

where  $\hbar$  is the reduced Plank constant,  $k_B$  is the Boltzmann constant, and  $\omega_i$  is the vibrational frequency of the carbon source species on the catalyst. The vibrational frequency is obtained by diagonalizing the dynamic matrix, in which only the carbon source species are allowed to move. This approach effectively reduces the calculation time while still considering the effect of the catalyst on the vibrational frequency [11, 12]. The calculated vibrational frequencies of the carbon source species in each catalyst are shown in Table S5. We compare the calculated

vibrational frequency with a previous study [13]. Our results are consistent, so we can use the calculated parameters.

The parameter  $\mu_H$  depends on the  $T$  and the  $H_2$  partial pressure,  $p_{H_2}$ , which can be calculated using the following equation [9, 14, 15]:

$$2\mu_H = E_{H_2} - k_B T \ln \left( \frac{g k_B T}{p_{H_2}} \zeta_{trans} \zeta_{rot} \zeta_{vib} \right) \quad (S6)$$

where  $g$  is the degree of degeneration of the electron energy level, and  $E_{H_2}$  is the total energy of the  $H_2$  molecule obtained from the DFT calculation (our calculation result is  $-2.399$  Ry ( $-32.641$  eV)).  $\zeta_{trans}$ ,  $\zeta_{rot}$ , and  $\zeta_{vib}$  are partition functions for the translational, rotational, and vibrational motions, respectively. For the  $H_2$  molecule, a diatomic molecule, we can calculate  $\zeta_{trans}$ ,  $\zeta_{rot}$ , and  $\zeta_{vib}$  using the following equations [14, 15]:

$$\zeta_{trans} = \left( \frac{2\pi m k T}{h^2} \right)^{1/2} \quad (S7)$$

$$\zeta_{rot} = \frac{T}{\sigma \Theta_r} \quad (S8)$$

$$\zeta_{vib} = \frac{1}{1 - \exp \left( -\frac{\Theta_v}{T} \right)} \quad (S9)$$

where  $m$  is the mass of the H atom,  $\sigma$  is the symmetry factor, and  $\Theta_r$  and  $\Theta_v$  are the rotational and vibration temperatures of the  $H_2$  molecule, respectively.

Table S5. The vibrational frequencies of carbon source species on the Cu and Cu-Ni catalysts.

| Carbon source species | Catalysts | Vibrational frequency (cm <sup>-1</sup> )                 |                                               |
|-----------------------|-----------|-----------------------------------------------------------|-----------------------------------------------|
|                       |           | This study                                                | Previous study [13]                           |
| CH <sub>3</sub>       | gas       | 536.469, 1351.445, 1351.292, 3046.904, 3225.353, 3225.853 | 606.5, 1396.0, 1396.0, 3004.4, 3160.8, 3160.8 |
| CH <sub>2</sub>       | gas       | 996.870, 2892.304, 3042.647                               | 963.1, 2805.9, 3190.0                         |
| CH                    | gas       | 2740.802                                                  | 2733.1                                        |
| CH <sub>3</sub>       | Cu        | 125.484, 125.484,                                         |                                               |

|                    |         |                                                                                                                                 |  |
|--------------------|---------|---------------------------------------------------------------------------------------------------------------------------------|--|
|                    |         | 167.955, 325.559,<br>527.609, 527.609,<br>1124.971, 1345.361,<br>1345.361, 2918.810,<br>2993.108, 2993.109                      |  |
| CH <sub>2</sub>    | Cu      | 149.468, 299.808,<br>382.032, 388.073,<br>524.120, 645.050,<br>1272.822, 2900.294,<br>2942.063                                  |  |
| CH                 | Cu      | 470.932, 470.932,<br>610.292, 651.950,<br>651.950, 3067.130                                                                     |  |
| C <sub>surf</sub>  | Cu      | 554.756, 554.756,<br>564.971                                                                                                    |  |
| C <sub>sub-1</sub> | Cu      | 609.785, 611.517,<br>611.517                                                                                                    |  |
| C <sub>sub-2</sub> | Cu      | 593.204, 593.204,<br>663.872                                                                                                    |  |
| CH <sub>3</sub>    | Cu-Ni-1 | 223.779, 223.779,<br>243.720, 494.431,<br>594.856, 594.856,<br>1111.215, 1347.689,<br>1347.689, 2906.836,<br>3001.908, 3001.908 |  |
| CH <sub>2</sub>    | Cu-Ni-1 | 167.234, 269.135,<br>322.781, 435.518,<br>579.341, 666.582,<br>1285.554, 2872.344,<br>2910.766                                  |  |
| CH                 | Cu-Ni-1 | 397.919, 464.466,<br>617.442, 646.000,<br>662.297, 3046.711                                                                     |  |
| C <sub>surf</sub>  | Cu-Ni-1 | 452.316, 495.721,<br>715.536                                                                                                    |  |
| C <sub>sub-1</sub> | Cu-Ni-1 | 549.827, 576.899,<br>704.197                                                                                                    |  |
| C <sub>sub-2</sub> | Cu-Ni-1 | 596.153, 596.153,                                                                                                               |  |

|                    |         |                                                                                                                                 |  |
|--------------------|---------|---------------------------------------------------------------------------------------------------------------------------------|--|
|                    |         | 651.499                                                                                                                         |  |
| CH <sub>3</sub>    | Cu-Ni-2 | 210.454, 211.568,<br>335.586, 348.486,<br>463.841, 521.565,<br>1143.750, 1261.500,<br>1336.882, 2721.784,<br>2883.160, 2909.404 |  |
| CH <sub>2</sub>    | Cu-Ni-2 | 204.434, 286.545,<br>328.784, 439.364,<br>558.248, 669.587,<br>1284.197, 2871.880,<br>2908.049                                  |  |
| CH                 | Cu-Ni-2 | 390.217, 459.710,<br>615.219, 636.101,<br>673.553, 3044.787                                                                     |  |
| C <sub>surf</sub>  | Cu-Ni-2 | 456.712, 499.462,<br>735.526                                                                                                    |  |
| C <sub>sub-1</sub> | Cu-Ni-2 | 548.682, 637.004,<br>680.486                                                                                                    |  |
| C <sub>sub-2</sub> | Cu-Ni-2 | 564.321, 595.703,<br>699.301                                                                                                    |  |
| CH <sub>3</sub>    | Cu-Ni-3 | 166.259, 205.156,<br>275.822, 354.871,<br>433.926, 525.402,<br>1134.422, 1281.649,<br>1335.802, 2775.161,<br>2893.128, 2924.880 |  |
| CH <sub>2</sub>    | Cu-Ni-3 | 249.670, 292.333,<br>355.446, 487.169,<br>571.164, 669.054,<br>1329.825, 2732.693,<br>2959.198                                  |  |
| CH                 | Cu-Ni-3 | 385.765, 464.267,<br>592.411, 618.568,<br>663.712, 3041.693                                                                     |  |
| C <sub>surf</sub>  | Cu-Ni-3 | 464.385, 511.015,<br>728.083                                                                                                    |  |
| C <sub>sub-1</sub> | Cu-Ni-3 | 533.296, 634.533,                                                                                                               |  |

|                    |         |                              |  |
|--------------------|---------|------------------------------|--|
|                    |         | 673.969                      |  |
| C <sub>sub-2</sub> | Cu-Ni-3 | 568.958, 638,589,<br>695,693 |  |

## References

- 1 K. Kuchitsu and G. Graner, Structure of free polyatomic molecules : basic data, 1998, 214.
- 2 K. K. Irikura and D. J. Frurip, Computational Thermochemistry, 1998, **677**, <https://doi.org/10.1021/BK-1998-0677>.
- 3 Y. He, H. Wang, S. Jiang and Y. Mo, *Comput. Mater. Sci.*, 2019, **168**, 17–24, <https://doi.org/10.1016/J.COMMATSCI.2019.05.046>.
- 4 X. Pang, J. Yang, M. Pang and Y. Zhao, *J. Alloys Compd.*, 2020, **831**, 154747, <https://doi.org/10.1016/j.jallcom.2020.154747>.
- 5 K. Li, C. He, M. Jiao, Y. Wang and Z. Wu, *Carbon*, 2014, **74**, 255–265, <https://doi.org/10.1016/J.CARBON.2014.03.030>.
- 6 W. W. Pai, H. T. Jeng, C. –M. Cheng, C. –H. Lin, X. Xiao, A. Zhao, X. Zhang, G. Xu, X. Q. Shi, M. A. V. Hove, C. –S. Hsue and K. –D. Tsuei, *Phys. Rev. Lett.*, 2010, **104**, 036103, <https://doi.org/10.1103/PhysRevLett.104.036103>.
- 7 Y. –X. Wang and G. –C. Wang, *ACS Catal.*, 2019, **9**, 2261–2274, <https://doi.org/10.1021/acscatal.8b04427>.
- 8 K. Reuter and M. Scheffler, *Phys. Rev. B*, 2002, **65**, 1–11, <https://doi.org/10.1103/PhysRevB.65.035406>.
- 9 C. G. Van de Walle and J. Neugebauer, *Phys. Rev. Lett.*, 2002, **88**, 4, <https://doi.org/10.1103/PhysRevLett.88.066103>.
- 10 P. Li and Z. Li, *J. Phys. Chem. C*, 2020, **124**, 16233–16247, <https://doi.org/10.1021/acs.jpcc.0c02040>.
- 11 A. Mohsenzadeh, K. Bolton and T. Richards, *Surf. Sci.*, 2014, **627**, 1–10, 2014, <https://doi.org/10.1016/j.susc.2014.04.006>.
- 12 Y. A. Zhu, D. Chen, X. G. Zhou and W. K. Yuan, *Catal. Today*, 2009, **148**, 260–267, <https://doi.org/10.1016/J.CATTOD.2009.08.022>.
- 13 M. E. Jacox, *J. Phys. Chem. Ref. Data*, 2003, **32**, 1, <https://doi.org/10.1063/1.1497629>.
- 14 Y. Kangawa, T. Ito, A. Taguchi, K. Shiraishi and T. Ohachi, *Surf. Sci.*, 2001, **493**, 178–181, [https://doi.org/10.1016/S0039-6028\(01\)01210-9](https://doi.org/10.1016/S0039-6028(01)01210-9).
- 15 Y. Kangawa, T. Akiyama, T. Ito, K. Shiraishi and T. Nakayama, *Materials*, 2013, **6**, 3309–3360 <https://doi.org/10.3390/MA6083309>
